# Supplementary material for: Comparative Analysis of Infection by Rickettsia rickettsii Sheila Smith and Taiaçu Strains in a Murine Model
Source: MDPI journal article supplement (doi:10.3390/pathogens9090744), 2020-09-10
Supplement: s1 [file s1]

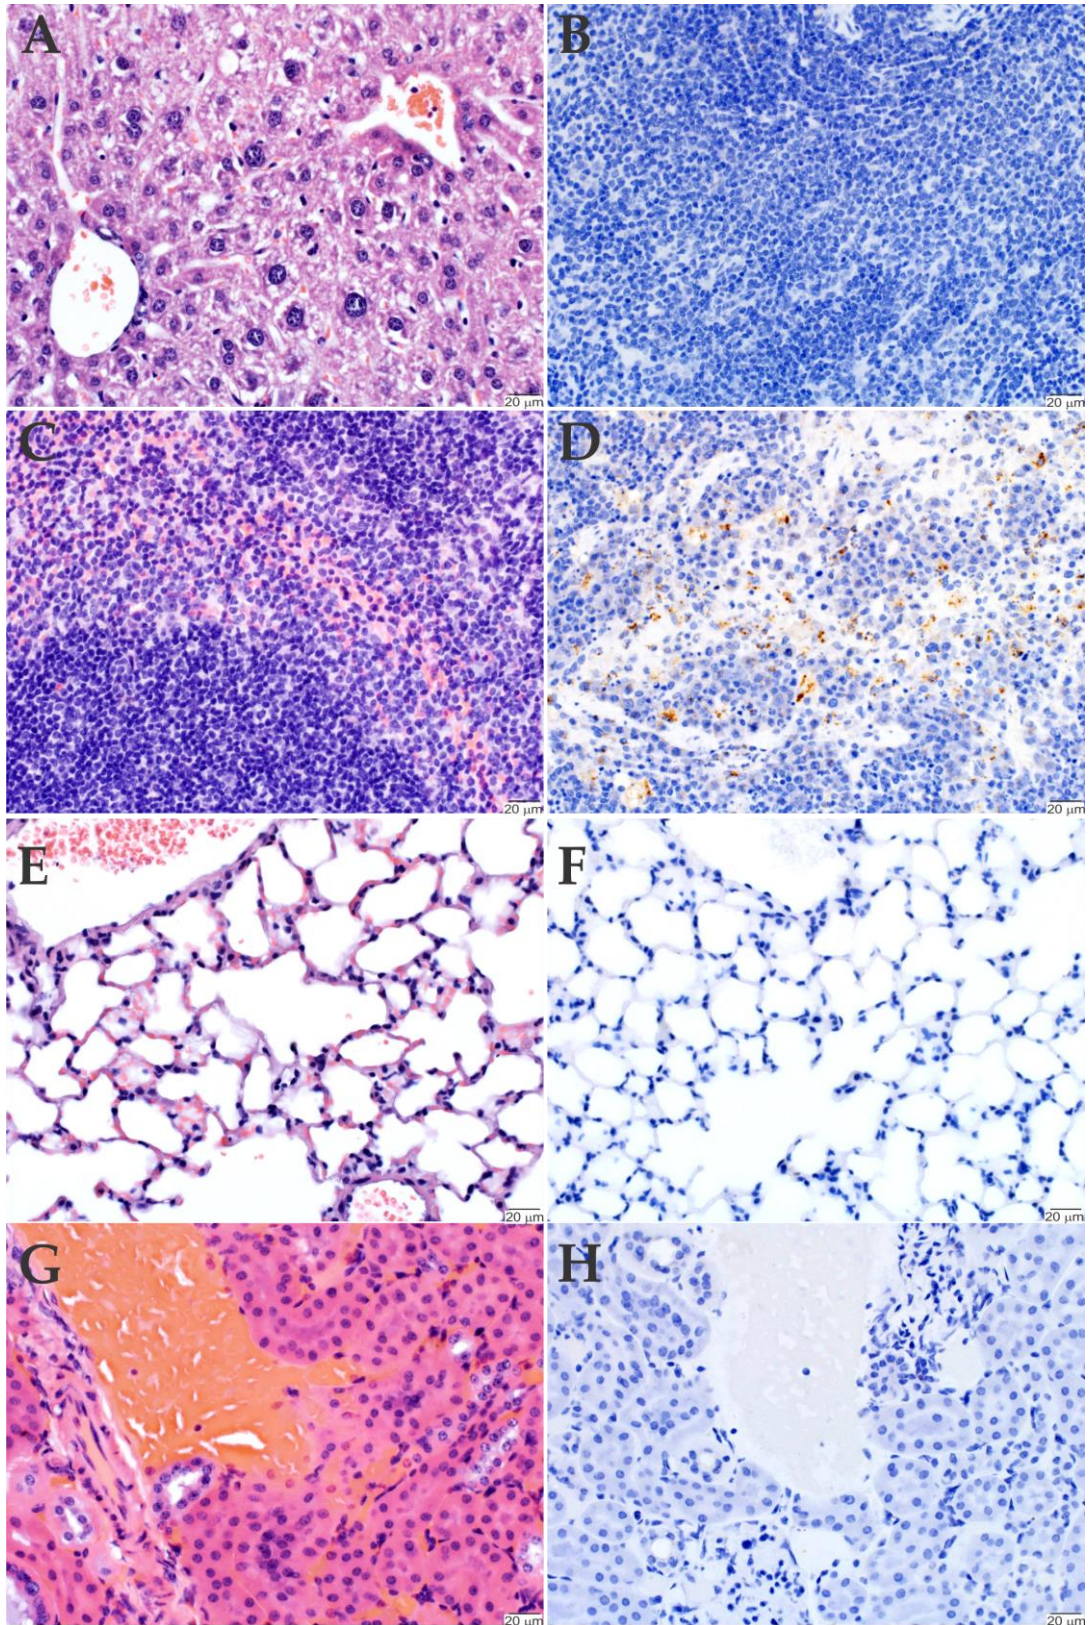

**Figure S1.** Histopathology and immunohistochemistry analyses of the organs of uninfected C3H/HeN mice. As a control, the liver (**A,B**), spleen (**C,D**), lungs (**E,F**) and kidneys (**G,H**) of uninfected mice were stained with hematoxylin and eosin (**A,C,E,G**) or processed for anti-*R. rickettsii* immunohistochemistry (brown) with hematoxylin counter stain (**B,D,F,H**). No histological changes or immunohistochemical labeling were observed in the organs of control mouse. (Scale bar = 20 µm).
